# Supplementary material for: Chemical Vapor Deposition of Uniform and Large-Domain Molybdenum Disulfide Crystals on Glass/Al2O3 Substrates
Source: MDPI journal article supplement (doi:10.3390/nano12152719), 2022-08-07
Supplement: s1 [file s1]

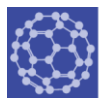

## Supplementary Materials

# Chemical Vapor Deposition of Uniform and Large-Domain Molybdenum Disulfide Crystals on Glass/ $\text{Al}_2\text{O}_3$ Substrates

Qingguo Gao <sup>1,\*</sup>, Jie Lu <sup>2</sup>, Simin Chen <sup>1</sup>, Lvcheng Chen <sup>1</sup>, Zhequan Xu <sup>1</sup>, Dexi Lin <sup>1</sup>, Songyi Xu <sup>1</sup>, Ping Liu <sup>1</sup>, Xueao Zhang <sup>2</sup>, Weiwei Cai <sup>2</sup> and Chongfu Zhang <sup>1,3</sup>

<sup>1</sup> School of Electronic Information, University of Electronic Science and Technology of China  
Zhongshan Institute, Zhongshan 528402, China

<sup>2</sup> College of Physical Science and Technology, Xiamen University, Xiamen 361005, China

<sup>3</sup> School of Information and Communication Engineering, University of Electronic Science and Technology of China, Chengdu 611731, China

\* Correspondence: gqgemw@163.com

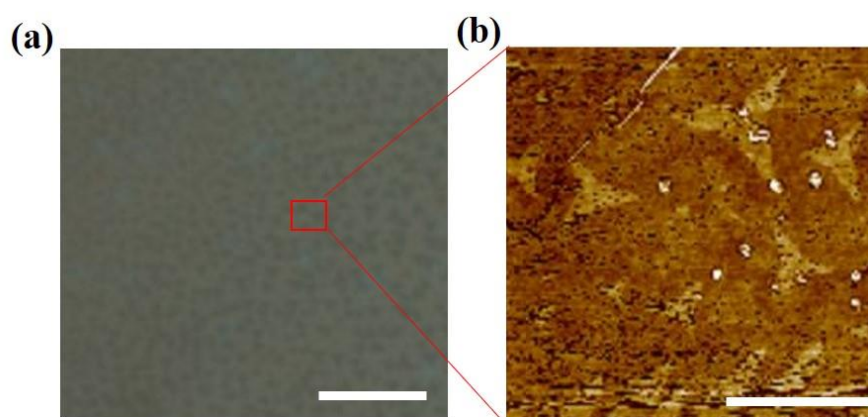

**Figure S1.** (a) Optical microscope images of the MoS<sub>2</sub> domains synthesised on the center region of glass/Mo substrates. The scale bar is 5  $\mu\text{m}$ . (b) AFM image of the CVD growth MoS<sub>2</sub> on glass/Mo substrates. The scale bar is 1  $\mu\text{m}$ .
